# Supplementary material for: RTTOV-gb v1.0 – updates on sensors, absorption models, uncertainty, and availability
Source: Copernicus journal article supplement (doi:10.5194/gmd-12-1833-2019), 2019-05-09
Supplement: Supplementary file 1 [file gmd-12-1833-2019-supplement.zip]

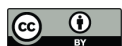

## *Supplement of*

# **RTTOV-gb v1.0 – updates on sensors, absorption models, uncertainty, and availability**

**Domenico Cimini et al.**

*Correspondence to:* Domenico Cimini ([domenico.cimini@imaa.cnr.it](mailto:domenico.cimini@imaa.cnr.it))

- [gmd-12-1833-2019-supplement-title-page.pdf](#)
- [RTTOVgb\\_101\\_pressure\\_levels\\_and\\_regression\\_limits.xlsx](#)

The copyright of individual parts of the supplement might differ from the CC BY 4.0 License.
